# Supplementary material for: High-level diterpene production by transient expression in Nicotiana benthamiana
Source: PubMed Central journal article supplement (PMC3878842; doi:10.1186/1746-4811-9-46), 2013-12-12

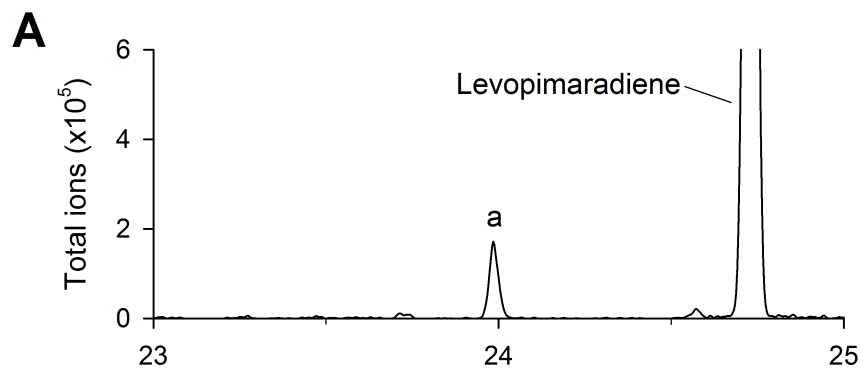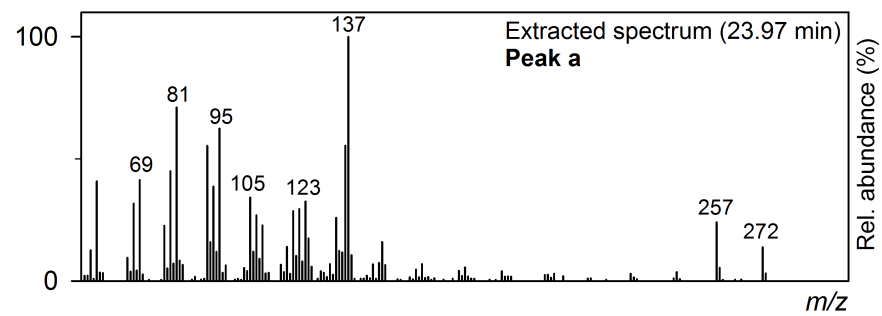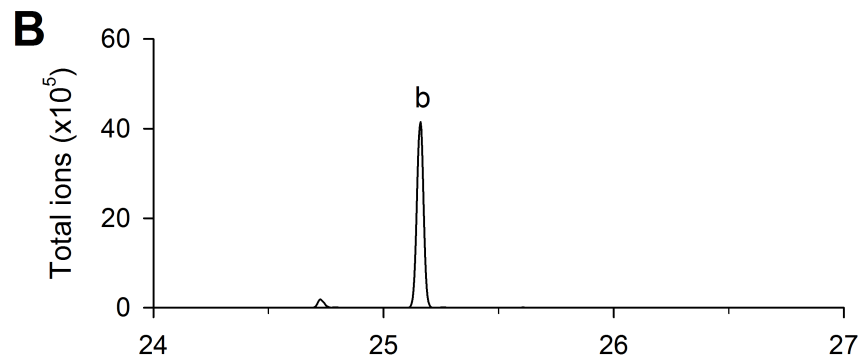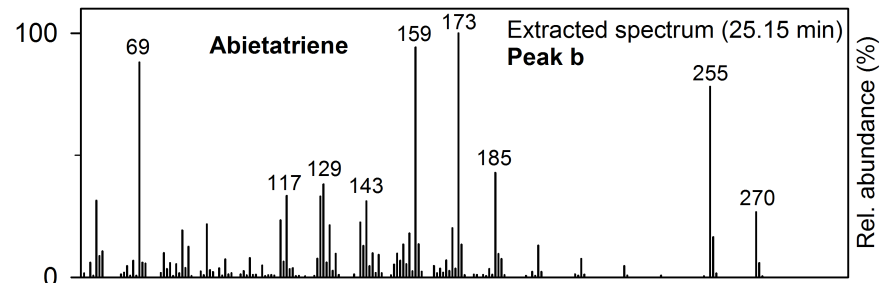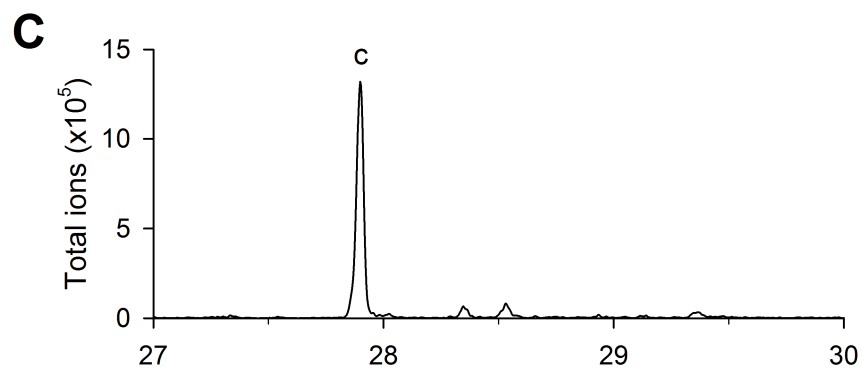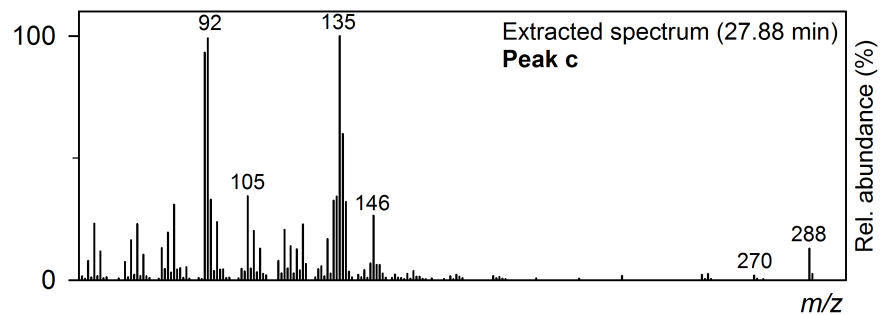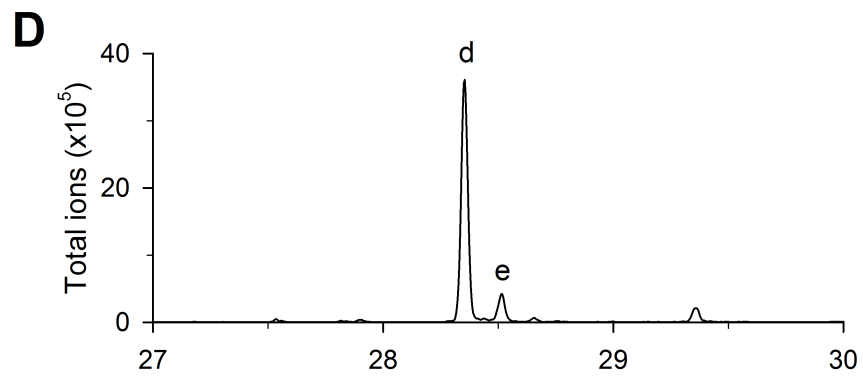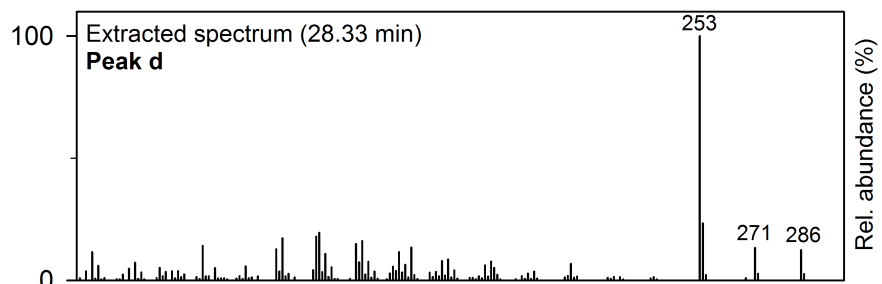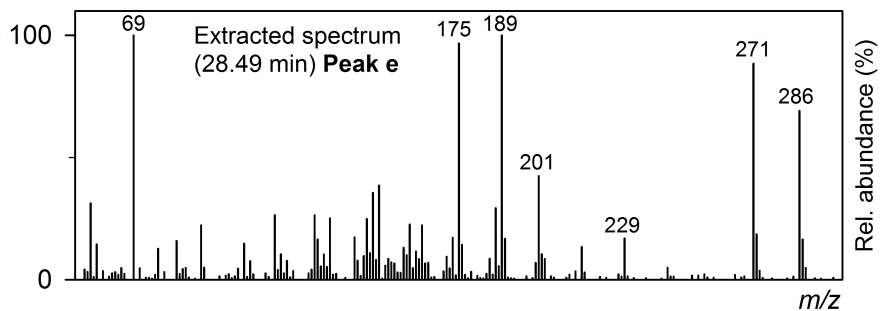

Supplement: 1746-4811-9-46-S4.pdf [file 1746-4811-9-46-S4.pdf]
